# Supplementary material for: Reassessing the role of magnetite during natural hydrogen generation
Source: Frontiers journal article supplement (doi:10.3389/feart.2023.1169356), 2023-04-13
Supplement: Table_1.docx [file Table_1.docx]

Supplementary Material

Reassessing the role of magnetite during natural hydrogen generation

# Supplementary Figures and Tables

**Supplementary Table 1.** Hyperfine parameters and quantitative results of room temperature Mössbauer analyses for both duplicate experiments at 80°C and 200°C. For related Mössbauer spectra, see **Figure 4**.
